# Supplementary material for: Bovine Neonatal Pancytopenia is a heritable trait of the dam rather than the calf and correlates with the magnitude of vaccine induced maternal alloantibodies not the MHC haplotype
Source: PubMed Central journal article supplement (PMC4269077; doi:10.1186/s13567-014-0129-0), 2014-12-17

**A**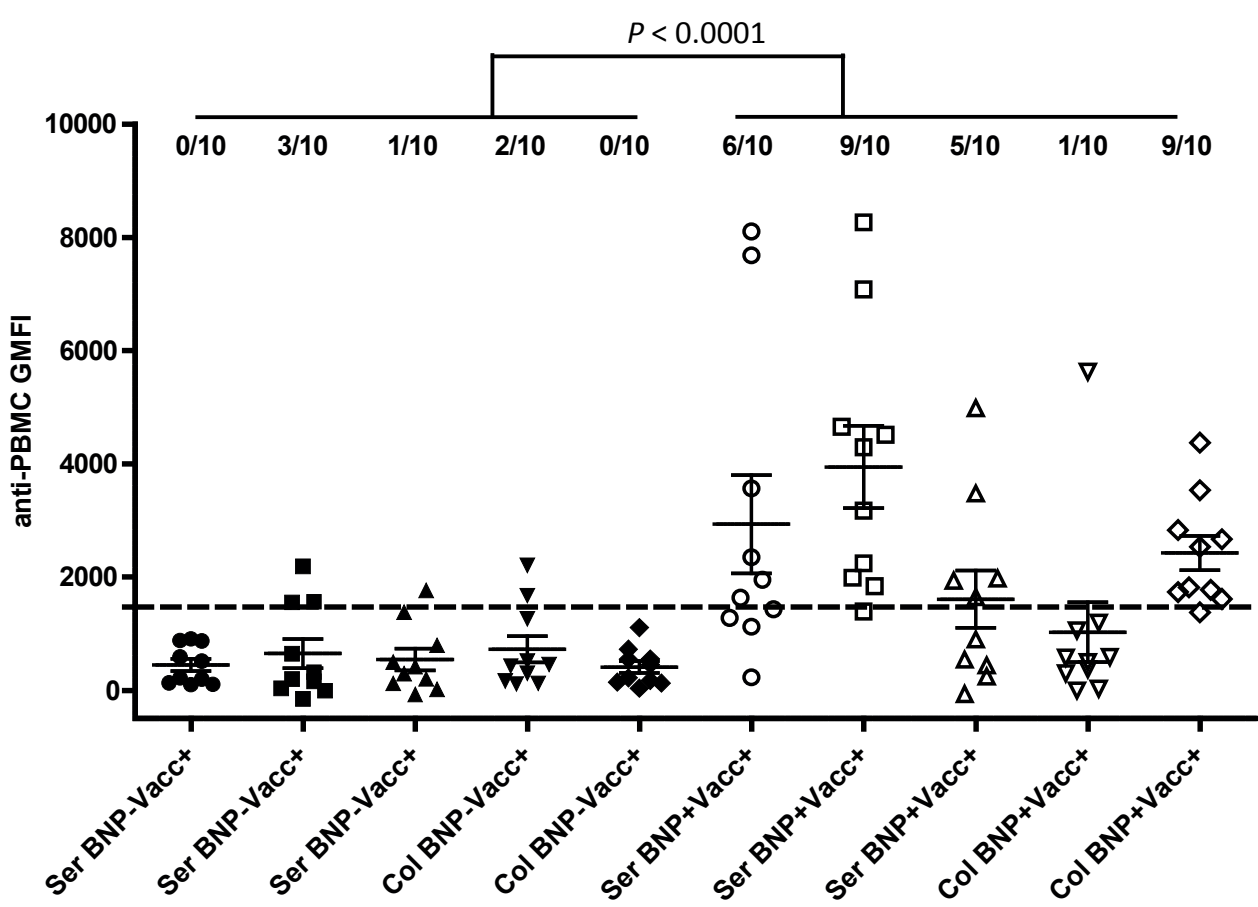**B**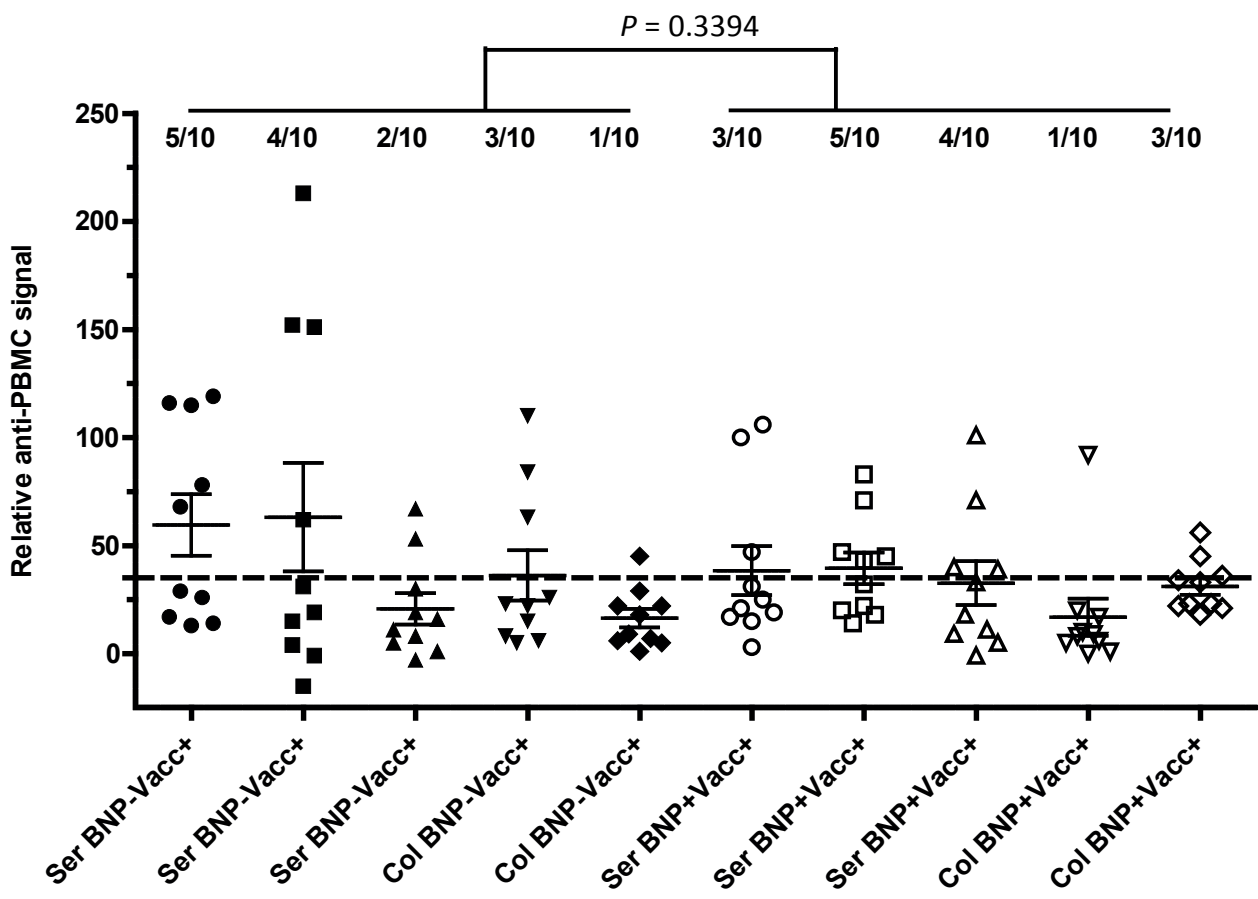

Supplement: 13567_2014_129_MOESM7_ESM.pdf [file 13567_2014_129_MOESM7_ESM.pdf]
